# Supplementary material
Source: PubMed Central journal article supplement (PMC6269319)
Supplement: 2017_187070-Disclosures_and_Contributions.pdf [file 2017_187070-Disclosures_and_Contributions.pdf]

Haematologica  
HAEMATOL/2017/187070  
Version 3

Idelalisib impairs T-cell-mediated immunity in chronic lymphocytic leukemia

Silvia Martinelli, Rossana Maffei, Stefania Fiorcari, Chiara Quadrelli, Patrizia Zucchini, Stefania Benatti, Leonardo Potenza, Mario Luppi, and Roberto Marasca

Disclosures: R.Mar received advisory board, honoraria and travel grants from Gilead; honoraria, advisory, travel grant and research grant from Janssen; honoraria and advisory from AbbVie; honoraria from Roche. M.Lup received advisory board, honoraria and travel grants from Gilead; advisory board from AbbVie; honoraria from Roche. L.Pot received advisory board from Gilead; advisory to MSD web Portal. The other authors have no disclosures to declare.

Contributions: S.Mar and R.Maf conceived and designed the experiments. P.Zuc and S.Ben collected the biological samples. S.Mar and C.Quad performed the experiments. S.Mar, R.Maf and S.Fio analyzed the data. S.Mar wrote the paper. M.Lup, L.Pot and R.Mar supervised the research, approved the data and revised the paper.
